# Supplementary material for: Specific multiplexed detection of mRNA splice variants based on size-coding DNA probes and universal PCR amplification
Source: Royal Society of Chemistry journal article supplement (doi:10.1039/d3an00597f), 2023-01-01
Supplement: d3an00597f1.pdf [file d3an00597f1.pdf]

## Electronic Supplementary Information

### **Specific multiplexed detection of mRNA splice variants based on size-coding DNA probes and universal PCR amplification**

Yuting Jia, Honghong Wang\*, Hui Wang, Fangfang Wang, Kejian Gao and Zhengping Li\*

Beijing Key Laboratory for Bioengineering and Sensing Technology; School of Chemistry and Biological Engineering, University of Science and Technology Beijing, 30 Xueyuan Road, Haidian District, Beijing 100083, China.

Email: wanghh@ustb.edu.cn; lzpbd@ustb.edu.cn.

#### Content List

- 1. Table S1. The sequences of the oligonucleotides used in this work**
- 2. Validation of amplification mechanism of mRNA splice variants assay by using polyacrylamide gel electrophoresis (PAGE)**
- 3. Optimization of the concentration of PA and PB**
- 4. Optimization of the cycle numbers of PCR**
- 5. Table S2. The correlation equations and corresponding correlation coefficients for multiple detections of mRNA splice variants**
- 6. The repeatability of the proposed strategy for multiple mRNA splice variants assay**
- 7. Table S3. Comparison of the proposed strategy with previously reported methods for mRNA splicing variants assay**

### 1. Table S1. The sequences of the oligonucleotides used in this work

| Name                    | Sequence (5'-3' direction)                                  |
|-------------------------|-------------------------------------------------------------|
| <i>hTERT</i> -Δ(7, 8)   | GUCCGCAAGGCCUUCAAGAGCCACGUCCUACGUCCAGUGCCAGGGGAU            |
| <i>hTERT</i> -Δ(11)     | CACCCACGCGAAAACCUUCCUCAGCUAUGCCCGGACCUCCAUCAGAGC            |
| <i>BRCA1</i> -Δ(9, 10)  | AAAGACGUCUGUCUACAUUGAAUUGGCUGCUUGUGAAUUUCUGAGACGG           |
| <i>BRCA2</i> -Δ(18, 4-) | GGGUGCUUCUUCAACUAAAAUACAGAU AUGAUACGGAAAUUGAUAGAAGC         |
| <i>TP53</i> -Δ(4)       | AAACAUUUUCAGACCUAUGGAAACUACUUCUGAAAACAACGUUCUGUCC           |
| <i>FGFR1</i> -Δ(4, 6-)  | GAAACAGAU AACACCAAACCAAACCCCGUAGCUCCAUAUUGGACAUCCCC         |
| PA <sub>Δ(7, 8)</sub>   | CCATCTCATCCCTGCGTGTCTGGCACTGGACGTAGGAC                      |
| PB <sub>Δ(7, 8)</sub>   | CCGCTTTCCTCTCTATGGGCCAAGGCCTTCAAGAGCCAC                     |
| PA <sub>Δ(11)</sub>     | CCATCTCATCCCTGCGTGTCTGATGGAGGTCCGGGCATAG                    |
| PB <sub>Δ(11)</sub>     | CCGCTTTCCTCTCTATGGGCAGTCACGCGAAAACCTTCCTCAG                 |
| PA <sub>Δ(9, 10)</sub>  | CCATCTCATCCCTGCGTGTCTGTCAGAAAATTCACAAGCAGC                  |
| PB <sub>Δ(9, 10)</sub>  | CCGCTTTCCTCTCTATGGGCAAGACGTCTGTCTACATTGAATTG                |
| PA <sub>Δ(18, 4-)</sub> | CCATCTCATCCCTGCGTGTCTATCGTTCTATCAATTTCCGTATCATAT            |
| PB <sub>Δ(18, 4-)</sub> | CCGCTTTCCTCTCTATGGGCGGGTGCTTCTTCAACTAAAATACAG               |
| PA <sub>Δ(4)</sub>      | CCATCTCATCCCTGCGTGTCTATCGCTAGGACAGAACGTTGTTTTTCAGGAAGT      |
| PB <sub>Δ(4)</sub>      | CCGCTTTCCTCTCTATGGGCTATAAACATTTTCAGACCTATGGAAACT            |
| PA <sub>Δ(4, 6-)</sub>  | CCATCTCATCCCTGCGTGTCTATGTACGTAGGGGATGTCCAATATGGAGCTACGG     |
| PB <sub>Δ(4, 6-)</sub>  | CCGCTTTCCTCTCTATGGGCCATGACGCATGAAACAGATAACACCAAACCAAA<br>CC |
| UP1                     | CCGCTTTCCTCTCTATGGGC                                        |
| UP2                     | FITC-CCATCTCATCCCTGCGTGTCT                                  |
| Internal standard       | FAM-AAAAAAAAAAAAAAAAAAAAA-PO <sub>4</sub>                   |
| poly(A)                 |                                                             |

## 2. Validation of amplification mechanism of mRNA splice variants assay by using polyacrylamide gel electrophoresis (PAGE)

To further support the amplification mechanism of the proposed mRNA splice variant assay, the hybridizations between oligonucleotide strands and PCR amplification products are characterized by non-denaturing PAGE. As shown in Fig. S1, *BRCA1*- $\Delta(9, 10)$  (Lane 2) and  $PA_{\Delta(9, 10)}$  (Lane 3) respectively show a defined band corresponding to 50 bp and 43 bp. In the presence *BRCA1*- $\Delta(9, 10)$  target, the hybridization products between *BRCA1*- $\Delta(9, 10)$  and  $PA_{\Delta(9, 10)}$  (Lane 4) and their reverse transcription reaction products (Lane 5) respectively show a clear band, where the reverse transcriptional reaction products (ss-cDNA) and the commercial synthetic cDNA have the same electrophoretic position, indicating that the *BRCA1*- $\Delta(9, 10)$  target is reversely transcribed to form cDNA. Then, the  $PB_{\Delta(9, 10)}$  hybridized with ss-cDNA and performed 12 cyclic amplification reactions, resulting in a clear double-stranded cDNA product band (Lane 9). After 26 PCR cycles' amplification, the PCR amplified product is shown in Lane 12. By contrast, the Blank control without *BRCA1*- $\Delta(9, 10)$  does not produce any observable band of amplification products except for the unreacted UP1 and UP2 (Lane 13). These results demonstrate that the proposed method is feasible for mRNA splice variants assay.

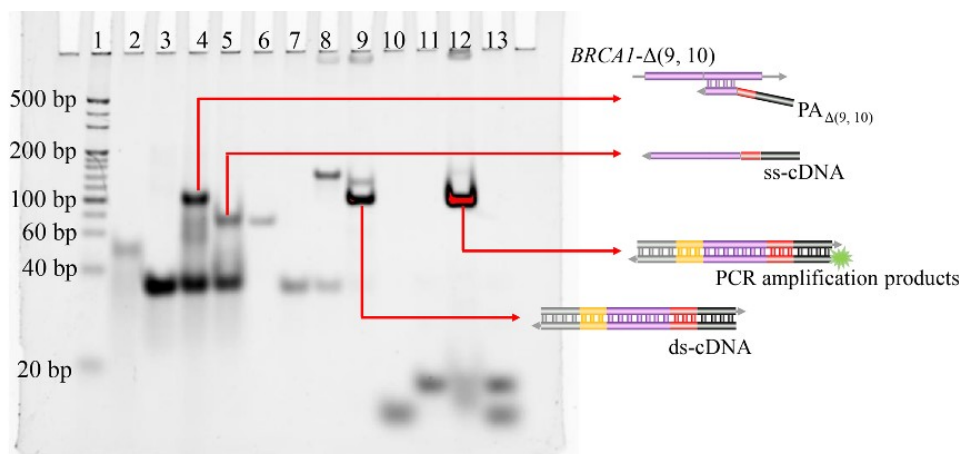

**Fig. S1.** Electrophoregram of non-denaturing PAGE analysis. Lane 1: double-stranded DNA markers; Lane 2: *BRCA1*- $\Delta(9, 10)$  (10  $\mu$ M); Lane 3:  $PA_{\Delta(9, 10)}$  (20  $\mu$ M); Lane 4: the hybridization products of *BRCA1*- $\Delta(9, 10)$  +  $PA_{\Delta(9, 10)}$ ; Lane 5: the reverse transcription product (ss-cDNA); Lane 6: the commercial synthetic cDNA (1  $\mu$ M); lane 7:  $PB_{\Delta(9, 10)}$  (2  $\mu$ M); Lane 8: the hybridization products of the commercial synthetic cDNA and  $PB_{\Delta(9, 10)}$ ; Lane 9: the double-stranded cDNA (ds-cDNA); Lane 10: UP1 (10  $\mu$ M); Lane 11: UP2 (10  $\mu$ M); Lane 12: the PCR amplification products for *BRCA1*- $\Delta(9, 10)$  assay; Lane 13: the PCR amplification product of Blank.

### 3. Optimization of the concentration of PA and PB

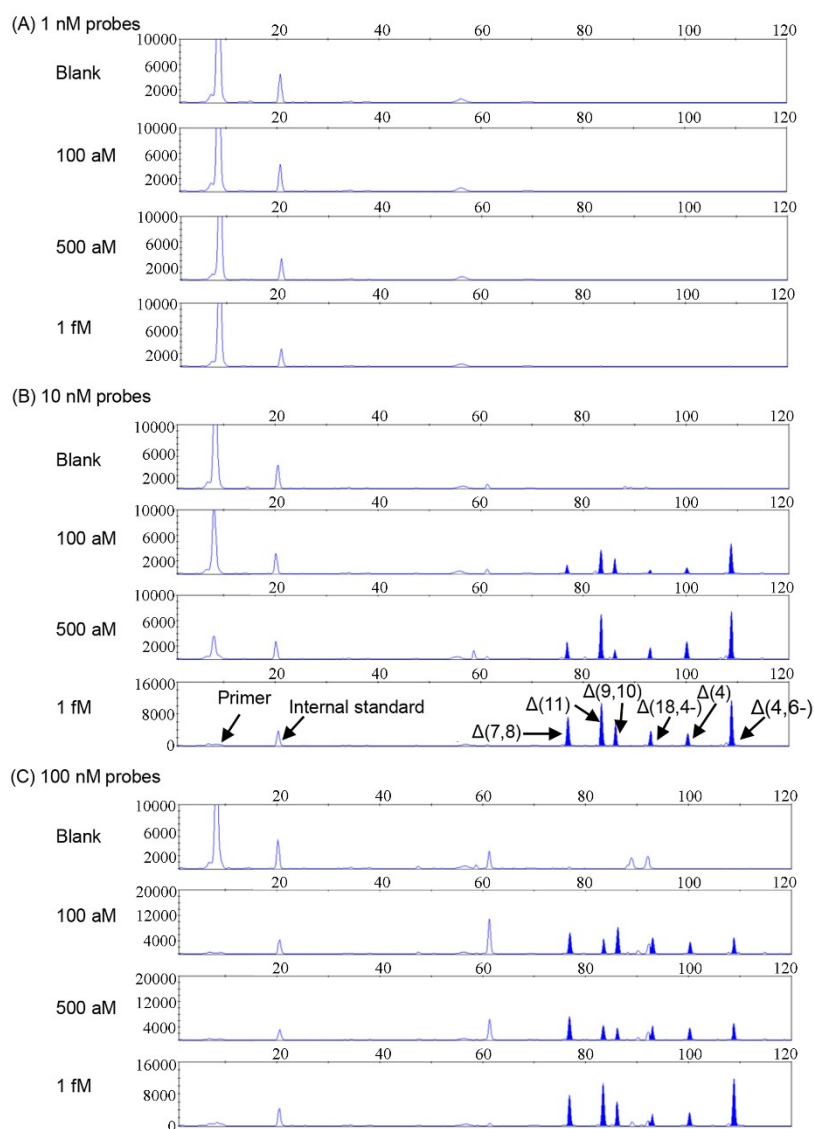

**Fig. S2.** The effect of the dosage of PA and PB on the mRNA splice variants assay based on size-coding DNA probes and universal PCR amplification. The dosage of PA and PB is 1 nM (A), 10 nM (B), and 100 nM (C), respectively.

The concentration of PA and PB will affect the efficiency of cDNA synthesis. To evaluate the influence of the dosage of probes, 1 nM, 10 nM, and 100 nM PA and PB were investigated by detecting the Blank and 6 types of mRNA splice variants including *hTERT*- $\Delta(7, 8)$ , *hTERT*- $\Delta(11)$ , *BRCA1*- $\Delta(9, 10)$ , *BRCA2*- $\Delta(18, 4-)$ , *TP53*- $\Delta(4)$ , *FGFR1*- $\Delta(4, 6-)$  with the proposed assay. The concentration of each mRNA splicing variant was in the order of 100 aM, 500 aM, and 1 fM, respectively. As depicted in Fig. S2, when the concentration of the probe was 1 nM (Fig. S2A), the splice variants do not produce a corresponding product peak after PCR amplification, indicating that

the concentration of the probe was too low to effectively generate cDNA for PCR amplification. In sharp contrast, when the concentration of the probe was 10 nM (Fig. S2B), six product peaks were observed for each splice variant, and no heterologous peaks were found. One can see from Fig. S2C, when the probe concentration increases to 100 nM, there were heterologous peaks at approximately 90 bp. This may be due to excessive probes leading to severe nonspecific hybridization causing nonspecific amplification. Therefore, considering the detection sensitivity and interference of non-specific amplification, 10 nM probe was selected for the multiple mRNA splice variants assay.

#### 4. Optimization of the cycle numbers of PCR

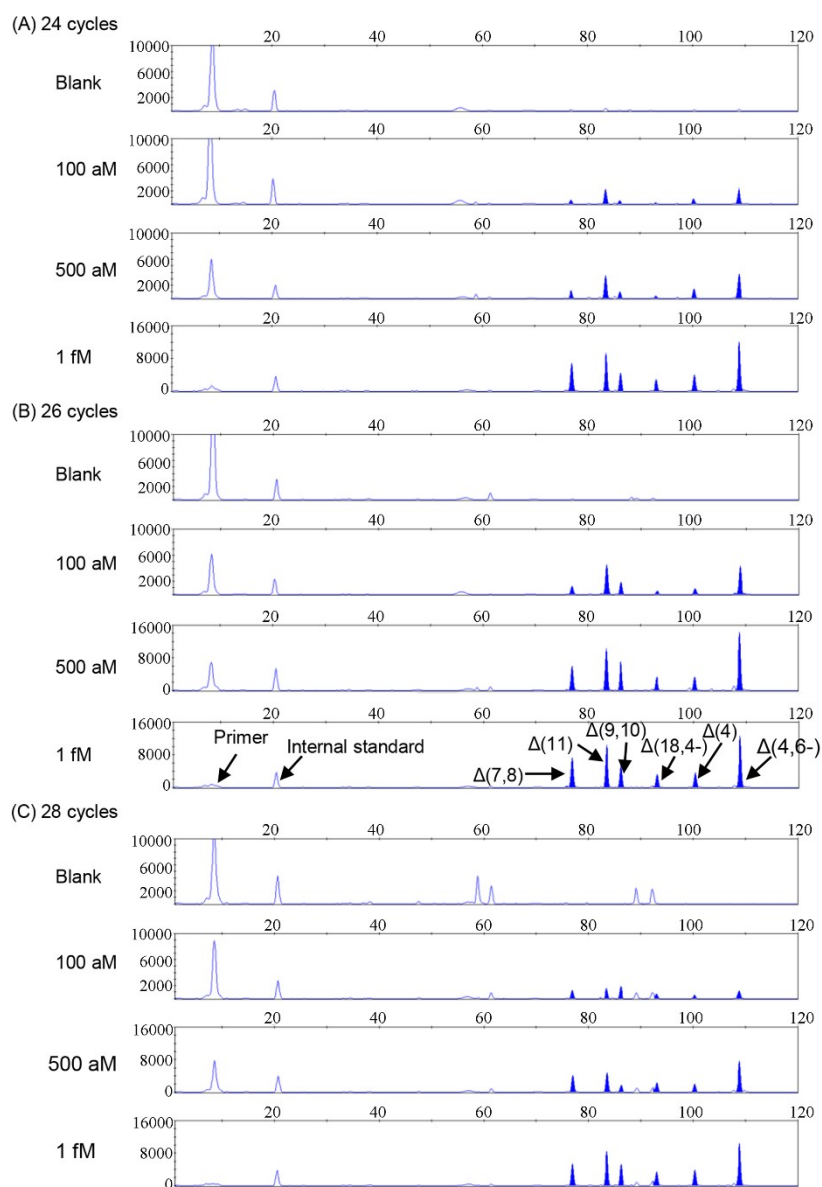

**Fig. S3.** The effect of the cycle number of PCR on the mRNA splice variants assay based on size-coding DNA probes and universal PCR amplification. The cycle number of PCR is 24 (A), 26 (B), and 28 (C), respectively.

Nextly, the cycle number of PCR was further optimized by detecting Blank and 6 types of mRNA splice variants including *hTERT*- $\Delta(7, 8)$ , *hTERT*- $\Delta(11)$ , *BRCA1*- $\Delta(9, 10)$ , *BRCA2*- $\Delta(18, 4-)$ , *TP53*- $\Delta(4)$ , *FGFR1*- $\Delta(4, 6-)$  with the proposed assay. The concentration of each mRNA splicing variant was in order of 100 aM, 500 aM, and 1 fM, respectively. As shown in Fig. S3, when the cycle number of PCR was 24 (Fig. S3A), the product peak of the 100 aM splice variants cannot be observed, indicating that the PCR reaction has not reached the plateau stage of amplification. When the cycle number of PCR was 26 (Fig. S3B), the product peaks of splice variants as low as 100 aM can be observed. As the cycle number of PCR increases to 28 (Fig. S3C), an obvious impurity peak was observed at 90 bp, indicating that non-specific amplification has occurred, which can interfere with the detection of target splice variants. Considering the detection sensitivity and interference from non-specific amplification, 26 cycles were selected as the optimal reaction conditions.

**5. Table S2. The correlation equations and corresponding correlation coefficients for multiple detections of mRNA splice variants**

| Splice variant                  | The correlation equation and corresponding correlation coefficient |              |
|---------------------------------|--------------------------------------------------------------------|--------------|
|                                 | (100 aM - 5 fM)                                                    |              |
| <i>hTERT</i> - $\Delta(7, 8)$   | $A=15.70+0.941\lg C_{\Delta(7, 8)}$                                | $R^2=0.9913$ |
| <i>hTERT</i> - $\Delta(11)$     | $A=20.83+1.261\lg C_{\Delta(11)}$                                  | $R^2=0.9953$ |
| <i>BRCA1</i> - $\Delta(9, 10)$  | $A=12.26+0.731\lg C_{\Delta(9, 10)}$                               | $R^2=0.9992$ |
| <i>BRCA2</i> - $\Delta(18, 4-)$ | $A=8.55+0.521\lg C_{\Delta(18, 4-)}$                               | $R^2=0.9766$ |
| <i>TP53</i> - $\Delta(4)$       | $A=10.20+0.631\lg C_{\Delta(4)}$                                   | $R^2=0.9590$ |
| <i>FGFR1</i> - $\Delta(4, 6-)$  | $A=24.41+1.441\lg C_{\Delta(4, 6-)}$                               | $R^2=0.9931$ |

## 6. The repeatability of the proposed strategy for multiple mRNA splice variants assay

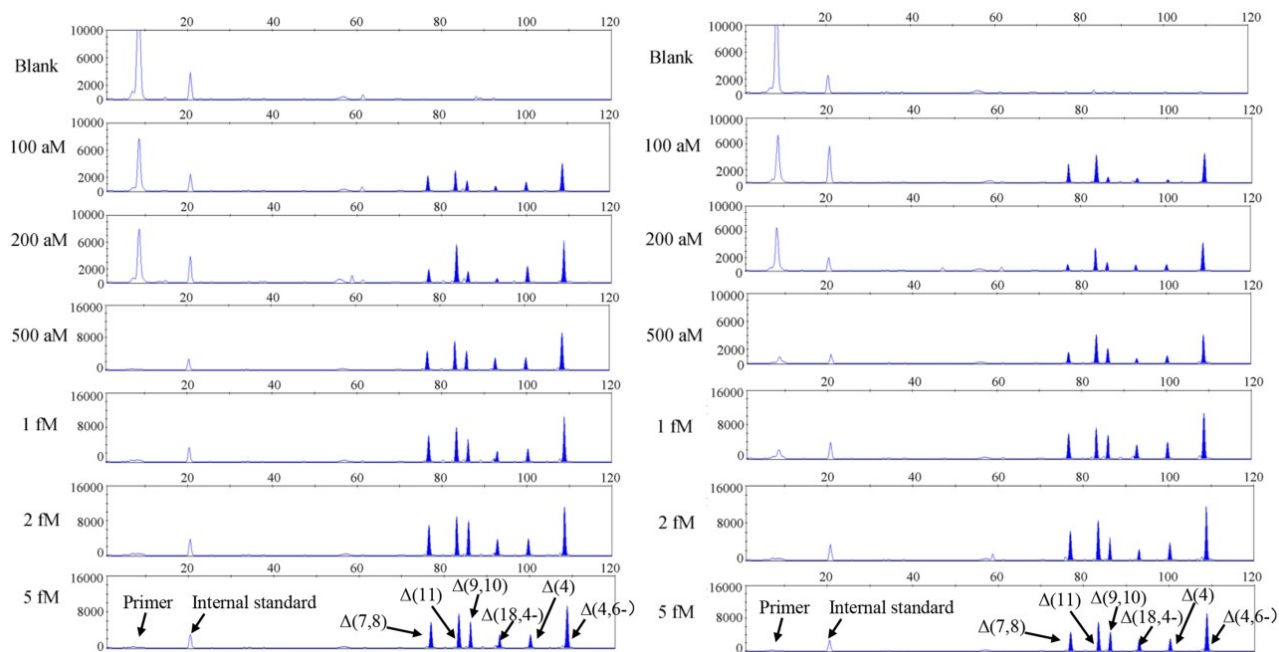

Fig. S4. The repeatability of the proposed strategy for multiple mRNA splice variants assay.

**7. Table S3. Comparison of the proposed strategy with previously reported methods for mRNA splicing variants assay**

| Target                                                                                                | Background Signal | Detection Limit            | Detection Throughput | Experimental Time | Reference                                |
|-------------------------------------------------------------------------------------------------------|-------------------|----------------------------|----------------------|-------------------|------------------------------------------|
| <i>CD45</i> mRNA splicing variants                                                                    | +                 | Single-cell analysis       | high throughput      | overnight         | ACS. Cent. Sci., 2018, 4(6): 680-687.    |
| JM and CYT mRNA splicing variants                                                                     | +                 | Semi-quantitative analysis | high throughput      | 4 h               | Mol. Neurobiol., 2018, 55(7): 6169-6181. |
| <i>FGFR</i> mRNA splicing variants endogenous genes mRNA                                              | -                 | 100 aM                     | 2 kinds              | 3 h               | RSC Adv., 2020, 10(11): 6271-6276.       |
| Alternative splicing analysis in total RNA                                                            | +                 | single cell analysis       | high throughput      | overnight         | Nucleic Acids Res. 2022, 50(22): e130    |
| <i>hTERT</i> , <i>BRCA1</i> , <i>BRCA2</i> , <i>TP53</i> , <i>FGFR</i> mRNA splicing variants, et al. | -                 | Single-cell analysis       | high throughput      | overnight         | Anal. Chem., 2022, 94(36): 12342-12351.  |
|                                                                                                       | -                 | 100 aM                     | high throughput      | 4 h               | This work                                |
